# Supplementary material for: Smoking, DNA Methylation, and Breast Cancer: A Mendelian Randomization Study
Source: PubMed Central journal article supplement (PMC8507148; doi:10.3389/fonc.2021.745918), 2021-09-28

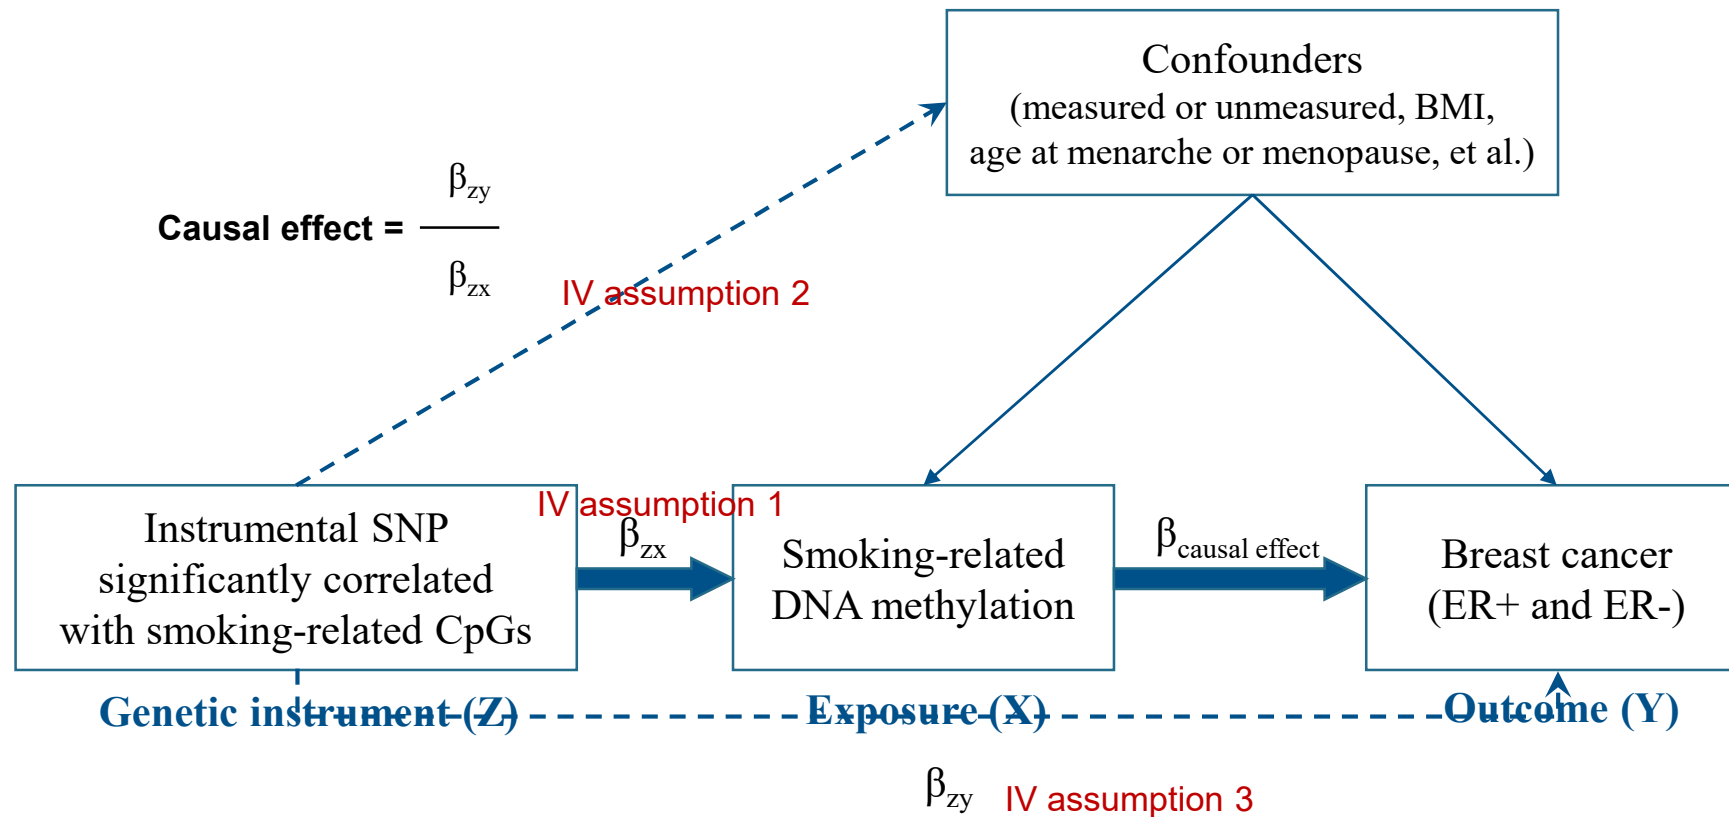

Supplement: Presentation_1.pdf [file Presentation_1.pdf]
